# Supplementary material for: Ultrafast fabrication of cavity-controlled perovskite-crystallites by a spin-coating method for microlasers
Source: Royal Society of Chemistry journal article supplement (doi:10.1039/d2tc05392f), 2023-01-01
Supplement: d2tc05392f2.pdf [file d2tc05392f2.pdf]

**Ultrafast fabrication of cavity-controlled perovskite-crystallites by spin-coating  
method for microlasers**

*Junhan Guo, Longtao Li, Bin Liu, Yang Tang, Liang Qin<sup>\*</sup>, Zhenbo Deng, Zhidong Lou,  
Yufeng Hu, Feng Teng, Yanbing Hou<sup>\*</sup>*

*J. Guo, L. Li, B. Liu, Y. Tang, Dr. L. Qin, Prof. Z. Deng, Prof. Z. Lou, Prof. Y. Hu, Prof.  
F. Teng, Prof. Y. Hou*

Key Laboratory of Luminescence and Optical Information Ministry of Education

Beijing JiaoTong University

Beijing 100044, P. R. China.

E-mail address: qinliang@bjtu.edu.cn; ybhou@bjtu.edu.cn

**Table 1.** Comparison table of time required for preparation of perovskite micro-nano  
single crystals.

| Material            | Morphology    | crystallization period | Reference |
|---------------------|---------------|------------------------|-----------|
| FAPbI <sub>3</sub>  | nanowire      | 20 h                   | [1]       |
| MAPbCl <sub>3</sub> | nanowire      | 12 h                   | [2]       |
| MAPbBr <sub>3</sub> | microdisk     | 20 min                 | [3]       |
| FAPbBr <sub>3</sub> | microdisk     | 20 h                   | [4]       |
| MAPbBr <sub>3</sub> | microdisk     | 1.5 h                  | [5]       |
| CsPbCl <sub>3</sub> | microplatelet | 15 min                 | [6]       |
| MAPbBr <sub>3</sub> | microdisk     | 2 min                  | This work |

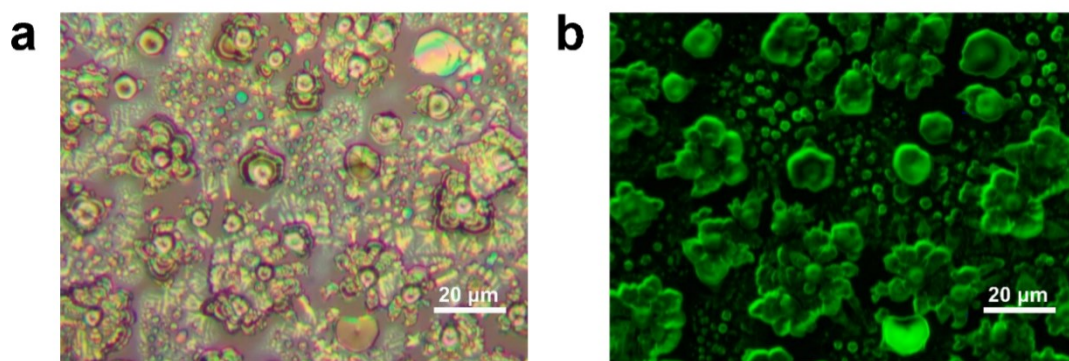

**Figure S1.** a, b) The microscopic image and fluorescence image of the crystals developed from DMF-only precursor solution.

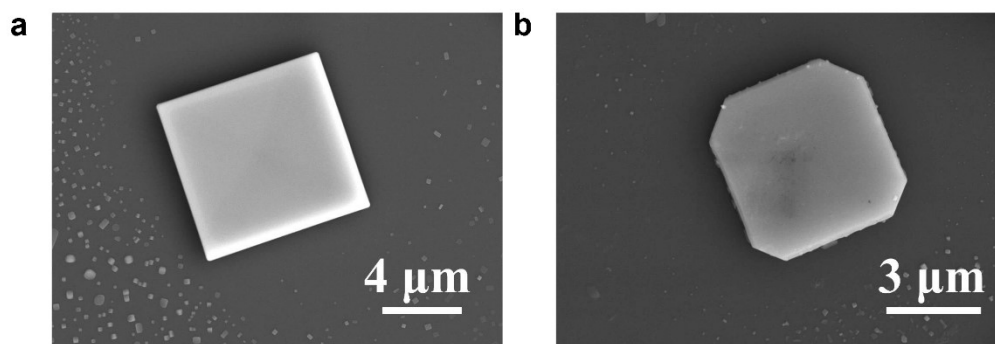

**Figure S2.** a, b) SEM images of square and octagonal perovskite crystals.

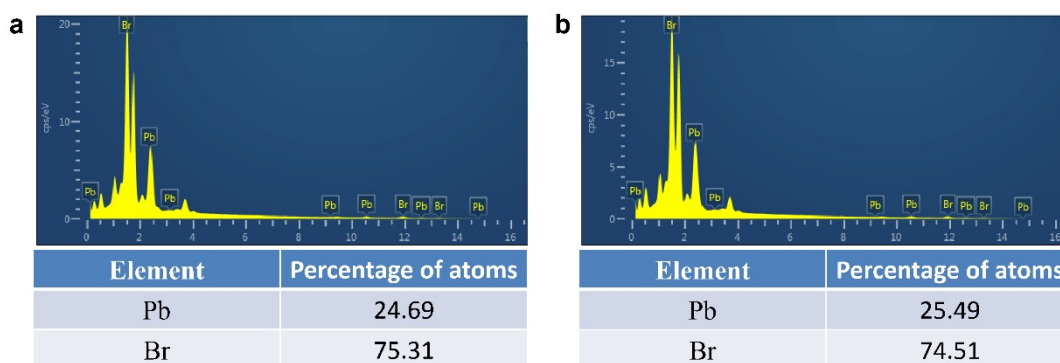

**Figure S3.** a) Distribution of elements in square perovskite microdisks. b) Distribution

of elements in octagonal perovskite microdisks.

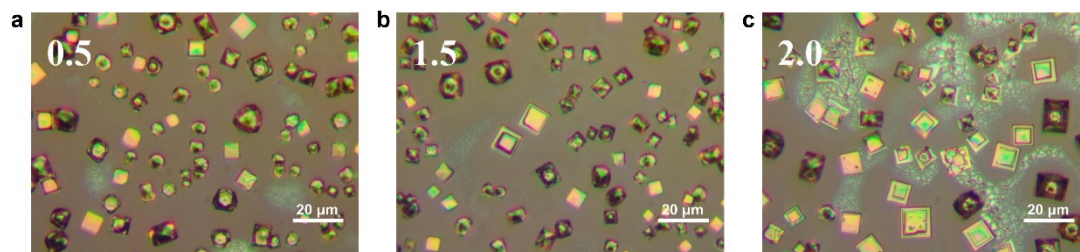

**Figure S4.** a-c) Microscopic images of crystals developed from the precursor solution with different contents of NMP.

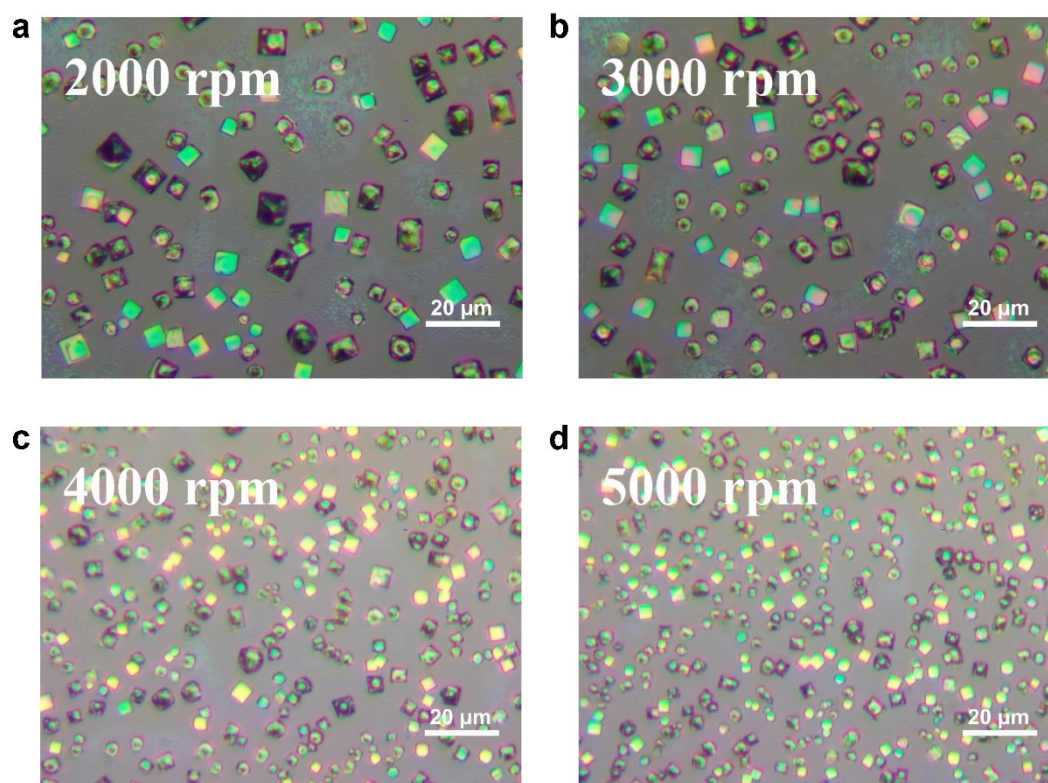

**Figure S5.** a-d) Microscopic images of crystals prepared at different spin-coating speeds.

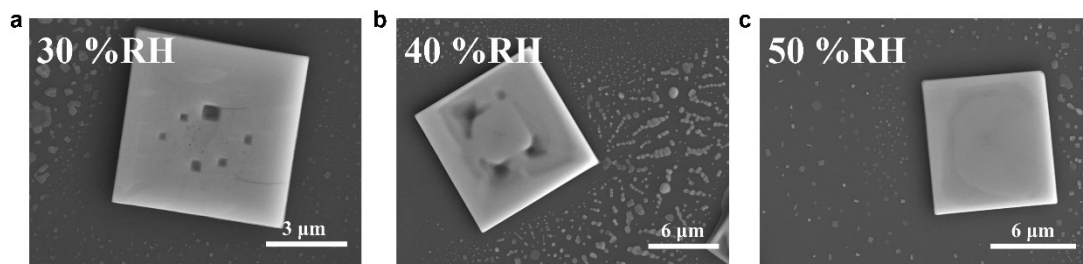

**Figure S6.** a) SEM images of square microdisks prepared under different humidity atmospheres.

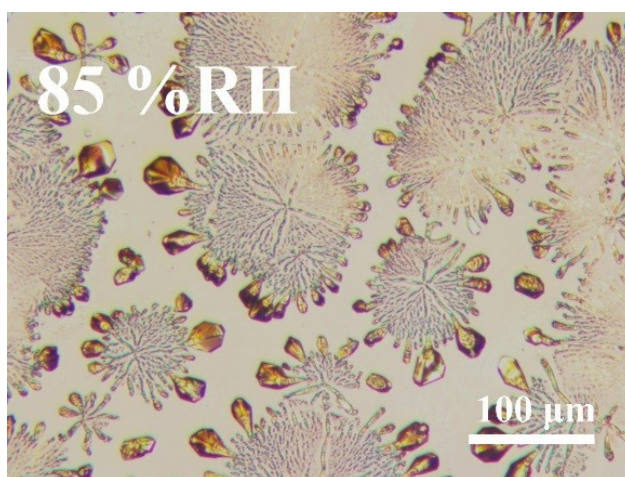

**Figure S7.** Microscopic image of crystals prepared at the humidity of 85 %RH.

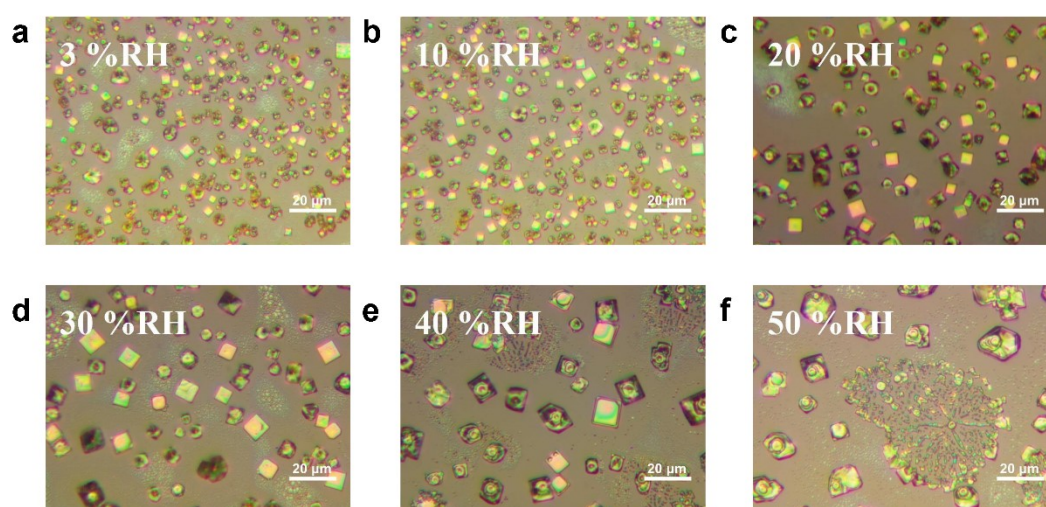

**Figure S8.** a-f) Microscopic images of MAPbBr<sub>3</sub> microdisks prepared at different

humidity levels.

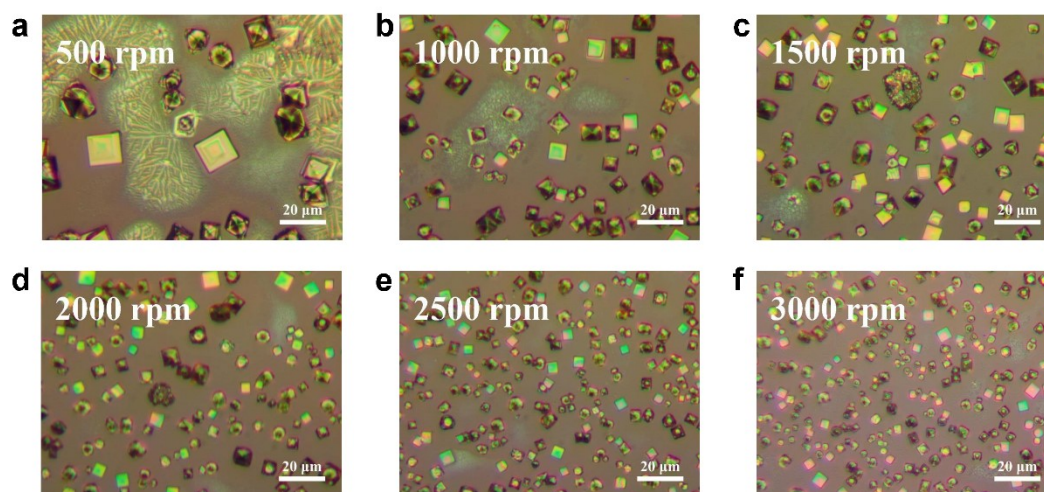

**Figure S9.** a-f) Microscopic images of MAPbBr<sub>3</sub> microdisks prepared at different spin-coating speeds.

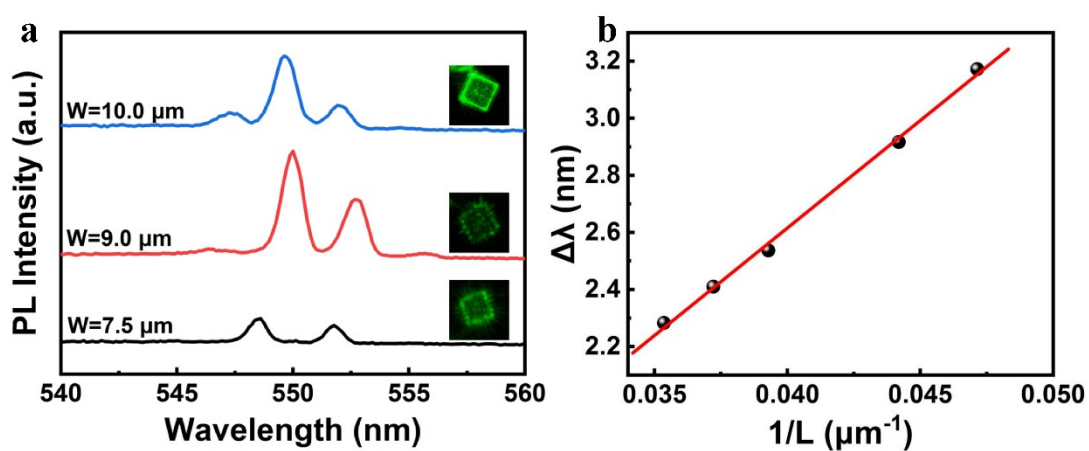

**Figure S10.** a) Spectra of perovskite microdisks with different sizes under the excitation of the laser with intensity above the threshold. b) The spacing  $\Delta\lambda$  between two modes is calculated and plotted as a function of the reciprocal of the total internal reflection path,  $L$ .

## References

- [1] Y. Fu, H. Zhu, A. W. Schrader, D. Liang, Q. Ding, P. Joshi, L. Hwang, X. Zhu, S. Jin, *Nano letters* **2016**, 16, 1000.
- [2] X. He, P. Liu, S. Wu, Q. Liao, J. Yao, H. Fu, *Journal of Materials Chemistry C* **2017**, 5, 12707.
- [3] W. Zhang, L. Peng, J. Liu, A. Tang, J. S. Hu, J. Yao, Y. S. Zhao, *Advanced Materials* **2016**, 28, 4040.
- [4] X. Li, K. Wang, M. Chen, S. Wang, Y. Fan, T. Liang, Q. Song, G. Xing, Z. Tang, *Advanced Optical Materials* **2020**, 8, 2000030.
- [5] J. Guo, Y. Tang, L. Li, B. Liu, L. Li, F. Meng, L. Qin, Z. Deng, Q. Cui, Z. Lou, *Advanced Optical Materials* **2022**, 2201519.
- [6] L. Zhang, J. Zhang, Q. Shang, J. Song, C. Li, W. Du, S. Chen, X. Liu, B. Zou, P. Gao, *ACS Applied Materials & Interfaces* **2022**.
